1 **Assessing fecal contamination from human and environmental sources using *Escherichia coli***  
2 **as an indicator in rural eastern Ethiopian households - a study from the EXCAM project**

3  
4 Loïc Deblais<sup>1,3§</sup>, Belisa Usmael Ahmedo<sup>2§</sup>, Amanda Ojeda<sup>4§</sup>, Bahar Mummed<sup>2</sup>, Yuke Wang<sup>5</sup>,  
5 Yitagele Terefe Mekonnen<sup>2</sup>, Yenenesh Demisie Weldesenbet<sup>2</sup>, Kedir A. Hassen<sup>2</sup>, Mussie Brhane<sup>2</sup>,  
6 Sarah McKune<sup>4</sup>, Arie H. Havelaar<sup>4</sup>, Song Liang<sup>6</sup>, Gireesh Rajashekara<sup>1,3,7\*</sup>

7  
8 <sup>1</sup>The Ohio State University, Columbus, OH, USA

9 <sup>2</sup>Haramaya University, Dire Dawa, Ethiopia

10 <sup>3</sup>Global One Health initiative, The Ohio State University, Addis Ababa, Ethiopia

11 <sup>4</sup>University of Florida, Gainesville, FL, USA

12 <sup>5</sup>Emory University, Atlanta, GA 30322, USA.

13 <sup>6</sup>University of Massachusetts, Amherst, MA, USA

14 <sup>7</sup>University of Illinois, Champaign, IL, USA

15

16 Running title: Sources of fecal contamination surrounding infants in LMICs

17

18 \*Corresponding author. E-mail: [gireesh2@illinois.edu](mailto:gireesh2@illinois.edu)

19

20

21

## 22 Abstract

23 Enteric pathogens are a leading causes of diarrheal deaths in low- and middle-income  
24 countries. The Exposure Assessment of *Campylobacter* Infections in Rural Ethiopia (EXCAM)  
25 project, aims to identify potential sources of bacteria in the genus *Campylobacter* and, more  
26 generally, fecal contamination of infants during the first 1.5 years of life using *Escherichia coli* as  
27 indicator. A total of 1,310 samples (i.e., hand rinses from the infant, sibling and mother, drinking  
28 and bathing water, food and fomite provided to or touched by the infants, areola swabs, breast milk  
29 and soil) were collected from 76 households between May 2021 and June 2022. Samples were  
30 assigned to two groups by infant age: TP1 (time point 1), infants between 4 and 8 months of age,  
31 and TP2, infants between 11 and 15 months of age. Fluorometric and semi-selective colorimetric  
32 approaches were used to quantify *E. coli* in the field samples. Overall, *E. coli* was ubiquitous  
33 within selected households (56.8% across the study). *E. coli* was more frequently detected than  
34 average (>53%) with high concentration (>2-log CFU) in soil (g) and per pair of hand, while the  
35 opposite trend (<33%; <1.5-log CFU) was observed in food provided to the infants (g or ml), per  
36 areola, and breast milk (ml;  $P < 0.01$ ). *E. coli* was frequently detected in fomites touched by the  
37 infants, drinking and bathing water (>51%), but at low concentration (<1.5-log CFU). Correlation  
38 analysis between *E. coli* concentration in different sample types suggested that the mother's hands  
39 might play a key role in the transmission of *E. coli* between the environment (i.e., soil, bathing  
40 water and fomites) and other family members (i.e., infant and sibling;  $P < 0.04$ ;  $r^2 > 0.3$ ). Using *E.*  
41 *coli* as surrogate, our study identified mother (hands and areola) as reservoirs likely to be involved  
42 in frequent transmission of fecal contaminants to infants within rural Ethiopian households.

43

## 44 Keywords

45 *Escherichia coli*, Fecal contamination, Eastern Ethiopia, Environmental sampling, Chromocult  
46 colorimetric medium, EC-MUG fluorometric broth.

47

## 48 **Introduction**

49 Many infectious diseases can affect the human gastrointestinal tract, with enteric pathogens  
50 posing a significant health risk. Enteric infections often impair the gut's intestinal integrity and  
51 function, leading to immediate adverse health consequences (e.g., diarrhea) and long-term chronic  
52 gastrointestinal issues (e.g., irritable bowel syndrome [IBS], inflammatory bowel disease [IBD],  
53 and chronic diarrhea) [1]. When combined with nutritional deficits during infancy, chronic  
54 exposure to enteric pathogens is linked to prolonged detrimental health conditions such as  
55 Environmental Enteric Dysfunction (EED) and stunting [2]. Conditions caused by EED are largely  
56 irreversible and lead to poor long-term health outcomes (e.g., diminished cognitive and physical  
57 development, weakened immune systems, and an increased risk of degenerative diseases later in  
58 life), especially when detected in young infant (<2-year-old) [3]. Enteric infections are also the  
59 primary causes of diarrhea, which is a leading cause of mortality and morbidity among children  
60 under five years old worldwide. These infections are particularly prevalent in resource-limited  
61 settings, due to limited access to clean water, inadequate sanitation, and poor personal hygiene  
62 practices. In 2017, diarrheal diseases were responsible for 1.6 million deaths globally, with the  
63 highest mortality rates primarily in Sub-Saharan Africa [4, 5]. Despite developmental efforts in  
64 these regions, access to clean water and proper sanitation management/infrastructure is precarious.  
65 Yet the evidence between enteropathogenic infections and related gastrointestinal disease is  
66 alarming, warranting global health interventions. This concern ultimately led the United Nations  
67 to include Clean Water and Sanitation as a Sustainable Development Goals (SDG-6) [6].

68 Climate change, food security, poor infrastructures, and inadequate water, sanitation, and  
69 hygiene (WASH) practices, contribute to a high disease burden in low and -middle-income  
70 countries (LMIC). Open defecation is a practice commonly performed by Ethiopian households  
71 and can lead to fecal-oral diseases such as diarrhea [7–9]. Global studies such as Etiology, Risk  
72 Factors, and Interactions of Enteric Infections and Malnutrition and the Consequences for Child  
73 Health and Development (MAL-ED) [10], WASH Benefits [11], and Sanitation Hygiene Infant  
74 Nutrition Efficacy (SHINE) [12] studies have highlighted the intricate interplay between these  
75 factors and their impact on health outcomes. These complex relationships present a significant  
76 challenge for low and -middle-income countries (LMIC) due to limited resources and inherent  
77 vulnerabilities to adapt to dramatic climatic shifts. Similar trends were observed in 2018 when our  
78 team conducted a cross-sectional study in rural Eastern Ethiopia as part of the CAGED project  
79 (*Campylobacter* Genomics and Environmental Enteric Dysfunction), during which WASH-  
80 oriented questionnaires revealed that only 23% of households used improved sanitation facilities  
81 shared between households and roughly 80% of households practiced open defecation [13]. In  
82 addition, most of the study population did not have access to clean water. Only 2% reported having  
83 access to a safely managed drinking water source on premises, available when needed, and not  
84 contaminated by fecal and chemical pollutants [13]. Diarrhea is often the most common symptom  
85 associated with a gastrointestinal infection, frequently characterized by a concentration of enteric  
86 pathogens disrupting the normal flora within the gut. Enteropathogenic microorganisms stem  
87 across different microbial groups, including bacteria (enteropathogenic or enterotoxigenic *E. coli*,  
88 *Shigella* spp., *Salmonella* spp., and *Vibrio cholerae*), parasites (such as *Cryptosporidium* spp.  
89 *Giardia*, and *Entamoeba histolytica*) and viruses (such as rotavirus, norovirus, astrovirus, and  
90 adenovirus). Given the numerous possible pathogens present at the point of fecal contamination,

91 scientists rely on detecting fecal indicators such as bacterial coliforms for routine quality and safety  
92 monitoring of drinking water sources [14]. Testing for fecal indicators, such as *E. coli*, a member  
93 of the *Enterobacteriaceae* family within the Gamma proteobacterium class, has been crucial in  
94 identifying potential sources of contamination in water sources, particularly in resource-limited  
95 settings where enteric infections are highly prevalent [15, 16]. Furthermore, *E. coli* detection is a  
96 valuable tool because associated detection methods are relatively quick, easy, and inexpensive for  
97 routine quality and safety monitoring [17, 18].

98         In this study, we investigated the prevalence and concentration of *E. coli* in households  
99 from rural Eastern Ethiopia where newly born infants are raised, aiming to assess the potential  
100 level of fecal contamination surrounding the infant and identify potential fecal transmission  
101 pathways. This study is part of the Exposure Assessment of *Campylobacter* Infections in Rural  
102 Ethiopia (EXCAM) project, which aims to systematically evaluate infants' exposure to  
103 *Campylobacter* and fecal contamination in rural districts of Haramaya, Eastern Ethiopia. *E. coli*  
104 was detected and quantified from a broad range of human (i.e., hand rinse, areola swabs, and breast  
105 milk) and environmental samples (i.e., drinking water, bathing water, food given to the infants,  
106 fomites touched by the infants and soil within the households) likely to be in close contact with  
107 infants.

108

## 109 **Materials and methods**

110 **Study area and sample collection.** The EXCAM study, nested within the CAGED project in the  
111 Eastern rural districts of Ethiopia [13, 19–21], recruited newborns from 79 households across 10  
112 kebeles. The EXCAM study was based on similar methodology used in the SaniPath study [22].  
113 Samples were collected during two distinct time windows: first, when infants were between 4 and

114 8 months of age (Time Point [TP] 1, between May 2021 and December 2021), and second, when  
115 they were between 11 and 15 months of age (TP 2, between December 2021 and June 2022). This  
116 approach allowed for the analysis of how behavior-mediated exposures may change with age  
117 during critical developmental stages. Additional details about the study area are previously  
118 described [13, 19–21]. Initially, 79 infants were included in TP1, decreasing to 76 in TP2 due to  
119 dropouts. Among the 76 infants who completed this study, 41 (54%) were male and 35 (46%) were  
120 female.

121 A total of 1,310 samples were collected across surveyed households between May 2021  
122 and June 2022. During TP1, 586; samples were collected from infants under 8 months of age,  
123 while in TP2, 724 samples were collected from infants when they reached 11 to 15 months.  
124 Between 101 and 265 samples were collected by sample type during this study, with an average  
125 of 17 samples per household and 131 samples per kebele. Breast milk samples were mostly  
126 collected at TP1 because most mothers stopped giving breast milk when the infants were above 11  
127 months of age. Soil samples collected inside the households were only collected at TP2 (n=57)  
128 because the infants motility increase after 11 months of age, and thus, allowing them to move  
129 around. Across the two periods, a total of 429 hand rinses, 117 breast milk samples, 149 areola  
130 swabs from the mother, 148 drinking water, 44 bathing water, 101 foods consumed by the infants,  
131 265 fomites and 155 soil samples were collected. A total of 916 and 394 samples were collected  
132 during the dry season (between October and May) and rainy season (between June and September),  
133 respectively.

134 Three hand rinse samples (infant, sibling, and mother) per household per time point were  
135 collected by washing the hands of the surveyed individuals into a 1 L plastic bag prefilled with  
136 200 ml of sterile distilled water. Hands were washed using normal hand-to-hand frictions for 30

137 seconds inside the bag. Areola swabs were collected using cotton swabs (Sterile Cotton Tipped  
138 Applicators, Puritan Medical Products; Guilford, ME) humidified in sterile water. The humidified  
139 swab was applied by the mother? directly to the skin, rotating it in a circular pattern on both areolas.  
140 The inoculated swab was transferred to a 15 ml tube prefilled with 4 ml Letheen broth (Difco BD;  
141 Becton, NY). Once the areola swab was collected, the areolas were cleaned with 70% ethanol to  
142 remove potential surface contaminants before collecting the breast milk. The breast milk samples  
143 were manually collected by the mother by applying pressure with her hand. The breast milk (at  
144 least 1 ml per mother per time point) was collected into a sterile 60 ml specimen collection cup  
145 (Starplex Scientific; Etobicoke, Canada). It should be noted that the mothers might not always  
146 have properly sanitized their hands before milk collection, potentially introducing contaminants  
147 into the milk. One liter of drinking and bathing water that was stored in a larger container in the  
148 household (e.g., bottles and jerrycans) were aseptically collected into four 532 ml Whirl-pak bags  
149 (Nasco WHIRL-PAK, Boston, MA) for each household at both time points. Foods (at least 10 g  
150 per household per time point) consumed by the surveyed infants was collected in a sterile 60 ml  
151 screw-capped container (Starplex Scientific; Etobicoke, Canada) using the utensil (e.g., spoon,  
152 fingers) commonly used to manipulate the food and feed the infant. Surfaces (aka. fomites) the  
153 most frequently touched by the surveyed infants were swabbed using a Speci-sponge (Nasco  
154 WHIRL-PAK; Boston, MA) pre-humidified with 10 ml of sterile water. The selection of three  
155 mostly touched fomites by the infant of the designated households was based on the total area  
156 touched by the infant (e.g., floor, carpet, or phone). Behavioral data related to these fomites for the  
157 surveyed infants are detailed in a companion paper (Wang et al., 2024, in preparation). The  
158 designated area was swabbed by moving the humected Speci-sponge back and forth at least five  
159 times on both sides. The inoculated sponge was transferred back into its original collection bag.

160 Three soil samples per household were collected inside (one sample where the floor is covered by  
161 a carpet or plastic sheet, and one sample where the floor is made of dust and dirt) and outside (one  
162 sample collected in front of the house) using boot socks humified with 207 ml of 10% skim milk.  
163 Each soil sample was collected by taking 15 steps within the designated area (preferably a 3 x 5 m  
164 area where children have access making sure to cover most of the area). Then the boot socks were  
165 removed using aseptic techniques and transferred into the original Whirl-pak bag humified with  
166 10% skim milk. All samples described above were stored and transported on ice to the lab for  
167 processing. Phosphate buffered saline solution or equivalent could not be used to collect the field  
168 samples (i.e., hand rinse, areola swab and fomites) instead of sterile water because the surveyed  
169 households did not believe the buffer was healthy to be touched, especially for the infant.

170  
171 **Sample Processing.** Hand rinse, drinking, and bathing water samples were designated as large,  
172 diluted samples, and thus, concentrated using 500 mL Disposable 0.22  $\mu\text{m}$  Nylon Vacuum Filter  
173 (Corning; Corning, NY). The membrane was aseptically removed and cut into 5 mm<sup>2</sup> pieces using  
174 sterile blade and forceps. The cut membrane was transferred into a 5 ml tube pre-filled with 4 ml  
175 of 1X peptone water (pH 7) and twenty 3-mm diameter glass beads. The sample was manually  
176 homogenized for at least 1 min to release cells from the nylon membrane. The supernatant was  
177 transferred into another 5 ml tube and centrifuged for 10 min at 4,500 rpm. The pellets were  
178 concentrated into 1 ml of 1X peptone water (pH 7).

179 Soil samples (boot socks), fomites, and areola swabs were identified as dry samples, and  
180 thus, resuspended into 25, 10, and 3 ml of 1X peptone water (pH 7), respectively. Resuspended  
181 samples were homogenized for 1 min by hand for bags or using a vortex for tubes. The liquid  
182 obtained for the homogenization was transferred into 50 ml tubes and centrifuged for 10 min at



183 4,500 rpm. The pellets were carefully concentrated into 1 ml of 1X peptone water (pH 7). Liquid  
184 food samples (e.g., cow milk and mango jus) and breast milk samples were used as is. One gram  
185 of solid food samples (e.g., biscuit, rice, spaghetti, macaroni and injera) was manually  
186 homogenized for 30 sec into a 100 ml Whirl-Pak bag (Seattle, WA) filled with 9 ml of 1X peptone  
187 water (pH 7). The homogenize samples were centrifuged for 10 min at 4,500 rpm and the pellet  
188 were resuspended into 1X peptone water (pH 7; 5 ml final volume).

189

190 **Detection and quantification of *Escherichia coli* in clear and translucent field samples using**  
191 **EC-MUG fluorometric approach.** The *E. coli* concentration in clear (e.g., drinking and bathing  
192 water) and translucent (e.g., hand rinse and fomites) samples was estimated using the modified  
193 MPN 96-well plate assay combined with EC-MUG fluorometric approach. Based on the total  
194 volume available per sample's type, a total of 15.84 ml of sample (n=88 reactions; 180 µl of the  
195 designated sample per well = one reaction) was tested from hand rinse, drinking and bathing water  
196 samples (also called "large liquid samples"), while 0.9 ml of concentrated samples (n=5 reactions;  
197 180 µl of the designated sample per well = one reaction) were tested from fomite, areola swab and  
198 food samples (also called "small liquid samples"). For both "large and small liquid samples", 1.62  
199 ml of EC-MUG broth was added into each well of a 96-deep well plate (VWR; Radnor, PA). In  
200 addition, four wells were inoculated with 180 µl of sterile 1X peptone water (pH 7; negative  
201 controls) or four wells were inoculated with 180 µl of an overnight *E. coli* culture known to  
202 produce fluorescence (positive controls). The inoculated plate was sealed using adhesive plate seal  
203 (Thermo Scientific; Waltham, MA) and incubated at 37°C for 48 hrs. After incubation, 200 µl of  
204 incubated product was transferred into a transparent 96-well plate (VWR; Radnor, PA) and expose  
205 to UV light to enumerate number of fluorescence wells (indicating the presence of *E. coli*). In

206 parallel, the field samples were serially 10-fold diluted up to 8 times in EC-MUG broth in case if  
207 the *E. coli* concentration was too high to be quantified using the first approach. For the analysis of  
208 the data, we hypothesized that one positive well harbors at least one viable *E. coli* CFU.

209  
210 **Detection and quantification of *Escherichia coli* population in turbid/opaque field samples**  
211 **using Chromocult colorimetric approach.** Opaque samples (Breast milk, soil and opaque food  
212 samples) were 10-fold serial diluted in 1X peptone water (pH 7). Two hundred microliters of  
213 undiluted and diluted samples were plated on Chromocult® Coliform agar (Sigma Aldrich  
214 Millipore; Saint-Louis, MO). The plates were incubated at 37°C for up to 48 hrs. Colonies with  
215 purple color (characteristic of *E. coli*) were recorded.

216  
217 **Statistical analysis.** *E. coli* concentration data were log-transformed. Statistical analyses were  
218 performed using JMP PRO 16 software (SAS Institute; Cary, NC, USA) and R v4.2.1  
219 (<https://cran.r-project.org/>). The normality of the *E. coli* concentration data was assessed using  
220 Goodness of fit combined with Shapiro test. Chi<sup>2</sup> and Wilcoxon tests were used to identify  
221 differences in *E. coli* prevalence and concentration, respectively based on the recorded metadata  
222 (e.g., kebeles, infant sex, samples types, and collection dates). A multivariate analysis (Pearson  
223 correlation and linear regression reported for each pairwise comparison axis) was used to identify  
224 correlation between the concentration of *E. coli* and sample types for the designated time points.  
225 A P-value of 0.05 was used at the cut-off for the above statistical tests.

226

## 227 **Results**

### 228 **Prevalence of *E. coli* in the Ethiopian households**

229 Overall, *E. coli* was detected in 58% (745/1,310) of all the samples, and no significant  
230 differences in *E. coli* prevalence were detected between TP1 (58% [n= 341/586; CI95%= 54-62%])  
231 and TP2 (56% [n= 404/724; CI95%= 52-59%]; P>0.05; **Table 1**). No difference in *E. coli*  
232 prevalence was detected across the 10 kebeles surveyed in this study (56% ±9.2% and 55% ±6.2%  
233 at TP1 and TP2, respectively; **Table 1**).

234 *E. coli* prevalence was divided into two distinct groups based on the sample types studied  
235 (e.g., prevalence below 33% versus higher than 53%; P<0.001; **Figure 1A**). Specifically, *E. coli*  
236 was more frequently detected in bathing water (91% [CI95%= 79-100%] at TP1 and 81% [CI95%=  
237 63-99%] at TP2), drinking water (76% [CI95%= 66-86%] at TP1 and 51.3% [CI95%= 40-63%]  
238 at TP2), fomites touched by the infants (62% [CI95%= 54-71%] at TP1 and 56% [CI95%= 48-  
239 65%] at TP2), mother hand rinse (80% [CI95%= 72-89%] at TP1 and 84% [CI95%= 76-93%] at  
240 TP2, respectively), sibling hand rinse (88% [CI95%= 81-97%] at TP1 and 85% [CI95%= 76-94%]  
241 at TP2), infant hand rinse samples (52% [CI95%= 41-64%] at TP1 and 78% [CI95%= 68-87%] at  
242 TP2), and soil samples collected inside the households (100% at TP2) compared to food eaten by  
243 the infants (33% [CI95%= 16-50%] at TP1 and 25% [CI95%= 14-36%] at TP2), areola swabs  
244 (16% [CI95%= 7-24%] at TP1 and 19% [CI95%= 10-28%] at TP2) and breast milk samples (21%  
245 [CI95%= 9-33%] at TP1 and 3% [CI95%= 0-7%] at TP2).

246 *E. coli* prevalence decreased across most sample types at TP2 compared to TP1 (c.a., 12%  
247 ±8 decrease; especially in bathing and drinking water, and breast milk; P<0.05; **Figure 1A**), while  
248 the opposite trend was observed with the infant hand rinse (c.a., 25% increase; P<0.002).  
249 Furthermore, variations in *E. coli* prevalence were also observed based on the date of sample  
250 collection and the age of the infants when the samples were collected. The prevalence of *E. coli* in  
251 the infant hand rinse significantly increased based on the infants' age at sampling ( $r^2=0.2$ ;

252 P=0.006). These results were not affected by the sex of the infant. Overall, 86% and 88% of the  
253 hand rinse samples collected from male and female infants were positive for *E. coli*, respectively.  
254 Other sample types also displayed equivalent *E. coli* prevalence between sex (P>0.05). On the  
255 other hand, the opposite trend was observed with drinking water and breast milk samples. The  
256 prevalence of *E. coli* in the drinking water and breast milk significantly decreased over time ( $r^2=-$   
257 0.2 and -0.3, respectively; P<0.004) and significantly decreased over time based on the age of the  
258 infant when the samples were collected ( $r^2=-0.2$  and -0.3, respectively; P<0.006).

259 No differences in *E. coli* prevalence were detected between the food types provided to the  
260 infants (e.g., biscuit soaked in water, cow milk, injera, Fanta soda, macaroni, sliced mango, and  
261 boiled rice and corn) and the fomites touched by the infants (e.g., bottle used to feed the infant,  
262 mobile phone, plastic bag, and teacups). However, it is worth noting that the sample size of the  
263 mentioned food items was small, which affected the power of the statistical analysis. *E. coli* was  
264 the most frequently detected in food items consumed by the infants (i.e., n= 3/6 cooked rice, 2/5  
265 macaroni, 4/9 cow milk and 10/45 injera) and fomites touched by the infants (i.e., n= 5/7 mobile  
266 phone and 6/15 tea cup).

267

### 268 **Concentration of *E. coli* in the Ethiopian households**

269 The concentration of *E. coli* discussed in this section is based only on the *E. coli* positive  
270 samples. Overall, *E. coli* was detected in 745 samples processed in this study (n= 341 and 404  
271 positive samples at TP1 and TP2, respectively). No difference in *E. coli* concentration was detected  
272 between kebeles and households for the sample types studied. On the other hand, the concentration  
273 of *E. coli* was separated into four distinct groups across the sample type (**Figure 1A**). Drinking  
274 and bathing water harbored low level of *E. coli* (<0.3-log CFU/ml), followed by foods eaten by

275 the infants, fomites touched by the infants, areola swabs and breast milk with a concentration of  
276 *E. coli* between 0.9- and 1.2-log CFU/ml, g or sample (i.e., areola swabs and fomites touched by  
277 the infants; **Figure 1A**). Interestingly, the hand rinse samples collected from the mother, sibling  
278 and infant harbored an average concentration in *E. coli* between 2.2- and 2.4-log CFU/pair of hands  
279 (**Figure 1A**). Finally, *E. coli* was the most abundant in the soil samples (4.5-Log CFU/g  $\pm$ 0.1). As  
280 observed with the prevalence data, the *E. coli* population from the hand rinse collected from the  
281 infants was positively correlated with the date of collection ( $r^2=0.3$ ;  $P=0.002$ ) and the age of the  
282 infant when the samples were collected ( $r^2=0.3$ ;  $P=0.001$ ). Therefore, *E. coli* was significantly  
283 higher in the hand rinse collected from the infant at TP2 (2.4-log CFU/fomite  $\pm$ 0.1;  $n=59$  samples  
284 positive for *E. coli*) compared to the ones collected at TP1 (2-log CFU/fomite  $\pm$ 0.1;  $n=40$  samples  
285 positive for *E. coli*;  $P=0.001$ ; **Figure 1A**). These results were not affected by the sex of the infant.  
286 Overall, 2.4-log *E. coli* CFU/hand rinse were detected from both male and female infants hand  
287 rinse samples, respectively. Other sample types also displayed equivalent *E. coli* prevalence  
288 between sex ( $P>0.05$ ). *E. coli* concentration was also significantly higher in fomites touched by  
289 the infants collected at TP2 (1.3-log CFU/fomite  $\pm$ 0.1;  $n=82$  samples positive for *E. coli*) compared  
290 to the ones collected at TP1 (1.1-log CFU/fomite  $\pm$ 0.1;  $n=75$  samples positive for *E. coli*;  $P=0.03$ ;  
291 **Figure 1A**).

292 The concentration of *E. coli* was not always associated with the prevalence in the  
293 designated sample type (**Figure 1B**). High prevalence ( $>53\%$ ) and concentration of *E. coli* ( $>2$ -  
294 log CFU/sample) were detected in soil (gram) collected inside the households and the pair of  
295 hands. Low prevalence ( $<33\%$ ) and concentration of *E. coli* ( $<1.5$ -log CFU/sample) were detected  
296 in the foods (g or ml) eaten by the infants, areola and breast milk (ml; **Figure 1B**). On the other

297 hand, *E. coli* was frequently detected in fomites touched by the infants, drinking and bathing water  
298 (ml; >51%), but at low concentration (<1.5-log CFU/sample; **Figure 1B**).

299

### 300 **Correlations between *E. coli* concentration in reservoirs in the Ethiopian households**

301 Distinct correlations in *E. coli* concentration were observed between sample types at the  
302 two time points, TP1 (**Figure 2A**) and TP2 (**Figure 2B**). At TP1, when the infants were under 8  
303 months of age, most of the correlations were centralized around the hand rinse samples collected  
304 from the household members (i.e., mother, sibling and infant; green area in **Figure 2A**).  
305 Specifically, the increase concentration of *E. coli* detected in the hand rinse from the mother was  
306 positively correlated with the concentration of *E. coli* from the infant hand rinse ( $r^2=0.5$ ;  $P=0.0001$ )  
307 and the sibling hand rinse ( $r^2=0.4$ ;  $P=0.002$ ; green area in **Figure 2A**). To some extent the  
308 concentration of *E. coli* between the infant hand rinse and the sibling hand rinse were positively  
309 correlated ( $r^2=0.3$ ;  $P=0.02$ ; green area in **Figure 2A**). Another set of the correlations were  
310 centralized around the interaction between the mothers and the infants (i.e., hands and areola  
311 swabs; pink area in **Figure 2A**). Both, the concentration of *E. coli* detected in the mothers' and the  
312 infants' hand rinses were positively correlated with concentration of *E. coli* in the areola swabs  
313 ( $r^2=0.3$  and  $0.4$ , respectively;  $P<0.009$ ), which was itself to positively correlated with the  
314 concentration of *E. coli* in the breast milk ( $r^2=0.3$ ;  $P=0.05$ ; pink area in **Figure 2A**). Both the  
315 concentration of *E. coli* in the areola swabs and infant hand rinse were positively correlated with  
316 the fomites touched by the infants ( $r^2=0.2$  for both sample types;  $P=0.03$ ; pink area in **Figure 2A**).

317 At TP2, when the infants were between 11 and 15 months of age, most of the correlations  
318 were centralized around the infants' hand rinse samples (**Figure 2B**). As observed in TP1, the  
319 concentration of *E. coli* in the infants' hand rinse was also positively correlated with the

320 concentration of *E. coli* from the mothers' hand rinse ( $r^2=0.3$ ;  $P=0.005$ ), and to some extent to the  
321 siblings' hand rinse ( $r^2=0.3$ ;  $P=0.03$ ; green area in **Figure 2B**). The concentration of *E. coli* in the  
322 mother hand rinse was still positively correlated with the one in the sibling hand rinse ( $r^2=0.4$ ;  
323  $P=0.008$ ; green area in **Figure 2B**). The concentration of *E. coli* in the infants' hand rinse was  
324 positively correlated with the concentration of *E. coli* from the fomites touched by the infants  
325 ( $r^2=0.3$ ;  $P=0.004$ ; purple area in **Figure 2B**), and to some extent with concentration of *E. coli* in  
326 the soil collected within the households and the bathing water ( $r^2=0.3$  and  $0.5$ , respectively;  
327  $P=0.03$ ; purple area in **Figure 2B**). The *E. coli* concentration in the soil samples collected inside  
328 the households was positively correlated with the bathing water ( $r^2=0.5$ ;  $P=0.01$ ; purple area in  
329 **Figure 2B**) and to some extent with fomites touched by the infants ( $r^2=0.3$ ;  $P=0.04$ ; purple area in  
330 **Figure 2B**).

331

## 332 **Discussion**

333 The transmission of fecal contaminants within rural households poses a significant health  
334 concern [23, 24]. Poor sanitation and inadequate hygiene practices can increase exposure to fecal  
335 pathogens, like diarrheagenic *E. coli*, *Salmonella*, and *Campylobacter*, leading to diarrheal  
336 diseases and other health complications, especially among vulnerable infants [25]. This study  
337 analyzed commensal *E. coli* as an indicator of fecal contamination in 1,310 samples collected  
338 across two time points in the households of infants in rural Ethiopia. Seventy-nine households  
339 participated in the study of which 76 completed follow-up. Overall, *E. coli* was detected in 56.8%  
340 of samples collected between May 2021 and June 2022. Similar observations were reported from  
341 studies conducted in at least 27 countries in Africa (*E. coli* prevalence between 47% - 83%),  
342 involving both environmental and household samples [26–28]. *E. coli* was detected in all sample

343 types. Hand rinse samples collected from the household members (i.e., mother, sibling, and infant)  
344 were most frequently contaminated with *E. coli* at high concentrations (>53% prevalence and  
345 >2.25-log CFU per set of hands). These findings are in alignment with previous studies reporting  
346 that hands are a recurrent carrier of fecal contaminant due to improper sanitation after defecation  
347 or contact with a contaminated environment [29–31]. *E. coli* was also frequently detected, albeit  
348 in lower concentration on fomites touched by the infants, and in their drinking and bathing water.  
349 *E. coli* concentration obtained in this study are equivalent to data reported from LMIC (e.g.,  
350 Bangladesh, Uganda and Cambodia) [32]. On the other hand, breast milk, areola swabs and food  
351 given to the infants were less likely to have *E. coli*. Nevertheless, it is breast feeding is an action  
352 frequently conducted in order to feed infants. Statistic models incorporating the *E. coli* data with  
353 the observation data recorded during this study will be developed to determine whether reservoirs  
354 less likely to harbored *E. coli* or at low concentration still have a predominant risk for the  
355 transmission of *E. coli* and other fecal contaminants to the infants.

356 The presence of *E. coli* within specific reservoirs and its potential movement between  
357 sample types significantly varied with age (when the infants were below 8 months of age versus  
358 when the infants were between 11 and 15 months of age). The presence of *E. coli* on the infants'  
359 hands was associated with their age ( $P<0.01$ ). *E. coli* was less frequently detected when the infants  
360 were under 8 months of age (53%) compared to the hand rinse samples collected when the infants  
361 were between 11 and 15 months of age (78%). This increase in *E. coli* prevalence may be linked  
362 to the infants' increased autonomy and their greater interaction with their environment. In Ethiopia,  
363 it is customary for mothers and infants to stay indoors together for extended periods post-birth,  
364 which may facilitate transfer of *E. coli* as the mothers' hand contamination was most correlated  
365 with *E. coli* levels in the infant hands during the first period of this study (when the infants were



366 under 8 months of age). Our data highlight the daily routine that the mothers are engaging with the  
367 infants could lead to repeated exposures of the infant with fecal contaminants, especially during  
368 breast feeding and handling the infant, as reported by previous studies [33, 34]. We previously  
369 showed that the enteric pathogen *Campylobacter* was highly prevalent in mothers' stools (83.1%)  
370 collected from the same households [21]. It was also found that the *Campylobacter* concentration  
371 in the mothers' stools correlated with the *Campylobacter* concentration in the infants' stools [21],  
372 which supports the transfer of fecal contaminants between mother and infant.

373         Interestingly, only minor differences in *E. coli* concentration were detected over time,  
374 suggesting that seasonal variations did not significantly impact *E. coli* presence in the studied  
375 households. On the other hand, there were marked changes in potential *E. coli* transfer within the  
376 households between the first period (TP1) and the second period (TP2) of this study. As mentioned  
377 above, initially interactions observed in TP1 predominantly involved mothers (i.e., hand rinse and  
378 areola swabs) and the infants. During the second period, the infant became central to these  
379 interactions, not only maintaining strong interactions with their mothers' hands but also  
380 increasingly engaging with other environmental reservoirs such as fomites, bathing water and soil  
381 within the households. This shift could be explained by the infants' developmental progression  
382 and contact with various surrounding reservoirs. Similar observations were reported in our  
383 previous study conducted in the same region in eastern Ethiopia, where the prevalence and  
384 concentration of *Campylobacter* in the infants were closely correlated with the concentration of  
385 *Campylobacter* in the soil collected inside the households and presence of specific livestock (e.g.,  
386 goat and sheep) [21]. It should be noted that when the infants reach 11 months of age, breast  
387 feeding becomes less frequent and with increasing exposure to other foods (e.g., injera, rice and  
388 dry biscuit), which are less likely to have *E. coli*. However, given all the households selected in

389 this study owned livestock (i.e., chicken, cow, goat and/or sheep), the infants were more likely to  
390 encounter particles rich in fecal contaminants [35].

391 As previously described in our recent published studies [20, 21], this study faced several  
392 limitations during its execution and sample collection, which significantly influenced the  
393 methodology used to detect and quantify *E. coli*. A limited amount of drinking water (i.e., 1 L per  
394 household per time point) could be collected from the selected households due to the constraint by  
395 limited resources available and cultural norms. Further, hesitation from some mothers to provide  
396 samples was encountered due to stigma, rumors, and cultural norms. Due to the sensitive nature  
397 of the operation, areola swabs and breast milk collections were performed privately by the mother.  
398 Thereby, the quality and number of samples collected was likely to fluctuate between households.  
399 The goal of this study was to develop an easy, low-cost, and high-throughput tests that could be  
400 applied on clear/translucent samples (e.g., drinking and bathing water, hand rinse, fomites touched  
401 by the infants and areola swabs) or opaque samples (e.g., food provided to the infants, milk and  
402 soil collected from the households). The prevalence and concentration of *E. coli* reported in this  
403 study were determined based on standardized selective colorimetric Chromocult plating [36, 37]  
404 and fluorometric EC-MUG approaches [38, 39]. Thereby, the results indicated the total *E. coli*  
405 population but do not differentiate between commensal and pathogenic *E. coli*. Further, we  
406 acknowledge that the prevalence of *E. coli* in the drinking water might have been underestimated  
407 due to the limited sample volume processed in this study. Given the mothers' hands harbored high  
408 level of *E. coli*, our study might have overestimated the prevalence of *E. coli* in the areola swabs  
409 and breast milk samples due to potential cross-contamination with the hands during the sample  
410 collection. The *E. coli* data will be compared to the behavioral data collected in the households

411 surveyed in this study to determine whether these sample types are reservoirs associated with the  
412 frequent transmission of *E. coli* to the infants (Wang et al., in preparation).

413 In conclusion, our study revealed a high prevalence and concentration of *E. coli* in the  
414 different reservoirs surrounding infants, indicating significant fecal contamination and potential  
415 for transmission of associated enteric pathogens (e.g., *Campylobacter* spp., pathogenic *E. coli*,  
416 rotavirus, and *Salmonella enterica*) within rural Ethiopian households. Future studies will assess  
417 whether the prevalence and concentration of *E. coli* could be used as bioindicator for other enteric  
418 pathogens (i.e., *Campylobacter*) in these low-income resource settings. Furthermore, the  
419 interconnections detected between *E. coli* reservoirs highlighted different routes that could lead to  
420 transmission of fecal contaminants within the households, and thus, could potentially lead to early  
421 infection of the infants with enteric pathogens.

422

## 423 **Declaration**

424

425 **Ethics approval and consent to participant.** Ethical approval was obtained from the University  
426 of Florida Internal Review Board (IRB201903141); the Haramaya University Institutional Health  
427 Research Ethics Committee (COHMS/1010/3796/20) and the Ethiopia National Research Ethics  
428 Review Committee (SM/14.1/1059/20). Written informed consent is obtained from all  
429 participating households (husband and wife) using a form in the local language (Afaan Oromo).  
430 Research findings will be disseminated to community stakeholders, including participants, through  
431 the existing CAB. Findings will be disseminated to scientific, academic, policy and development  
432 stakeholders through conferences and peer-reviewed journals and through the Feed the Future  
433 Innovation Lab for Livestock Systems. The Bill and Melinda Gates Foundation, the funder of this

434 trial, requires an open access data policy. Therefore, all manuscripts from this funded work will  
435 be open access with the data underlying the published research results available in a public  
436 repository. The website [https://www.gatesfoundation.org/how-we-](https://www.gatesfoundation.org/how-we-work/generalinformation/open-access-policy)  
437 [work/generalinformation/open-access-policy](https://www.gatesfoundation.org/how-we-work/generalinformation/open-access-policy) provides more information on this policy.

438 A Community Advisory Board including a representative of the community, religious  
439 leaders (imam), woreda and kebele administration, woreda women and children affairs, woreda  
440 bureau of health and agriculture, kebele health, and agricultural extension workers was established  
441 to guide the research team for better understanding of local context and entry to the community  
442 and is regularly engaged in the research [20]. Only the project manager at Haramaya University  
443 and the data manager at the University of Florida have access to personally identifiable information  
444 in the REDCap database. Any data shared among researchers within the project was identified and  
445 blinded. Materials and Data Transfer Agreements assure confidentiality of data when exchanged  
446 with international partners and others.

447  
448 **Consent for publication.** The authors confirmed that all relevant parties have reviewed the final  
449 version of the manuscript and have provided their explicit consent for its publication. All  
450 contributors and individuals involved in the research have given their informed consent for the  
451 publication of their data in this article.

452  
453 **Availability of data and materials.** All data and materials used in this study are available upon  
454 reasonable request. The datasets generated and/or analyzed during the current study are not  
455 publicly available due to ethical restrictions, but can be made accessible through the corresponding  
456 author on reasonable request. Any additional information regarding the materials and methods is

457 also available from the corresponding author upon request.

458

459 **Competing interests.** The authors declare that they have no competing interests.

460

461 **Funding.** This project is funded by the United States Agency for International Development  
462 Bureau for Food Security under Agreement #AID-OAA-L-15-00003 as part of Feed the Future  
463 Innovation Lab for Livestock Systems, and by the Bill & Melinda Gates Foundation  
464 OPP#1175487. Under the grant conditions of the Foundation, a Creative Commons Attribution 4.0  
465 Generic License has already been assigned to the Author Accepted Manuscript version that might  
466 arise from this submission. Any opinions, findings, conclusions or recommendations expressed  
467 here are those of the authors alone. Research reported in this publication was supported by the  
468 University of Florida Clinical and Translational Science Institute, which was supported in part by  
469 the NIH National Center for Advancing Translational Sciences under award number  
470 UL1TR001427.

471

472 **Author's contributions.** LD, BUA, AO and GR wrote the main manuscript text. LD, BUA, AO,  
473 were involved in the analysis of the data. LD, BUA, AO, YW, were involved in the interpretation  
474 of the data. LD, BUA, AO, BM, YTM, YW, YDW, KAH, and MB were involved in the acquisition  
475 of the data. SM, AHH, SL, LD and GR were involved in the conception and design of the work.  
476 All authors reviewed the manuscript

477

478 **Acknowledgements.** We thank the local community advisory board for facilitating this research  
479 in different selected kebeles. The EXCAM project is funded by the Bill & Melinda Gates  
480 Foundation to address food insecurity issues in Ethiopia and Burkina Faso through the project  
481 Equip - Strengthening Smallholder Livestock Systems for the Future (grant number  
482 OPP11755487). These funds are administered by the Feed the Future Innovation Lab for Livestock  
483 Systems, which was established by funding from the United States Agency for International  
484 Development (USAID) and is co-led by the University of Florida's Institute of Food and  
485 Agricultural Sciences and the International Livestock Research Institute. Support for the Feed the  
486 Future Innovation Lab for Livestock Systems is made possible by the generous support of the  
487 American people through USAID. The contents are the responsibility of the authors and do not  
488 necessarily reflect the views of USAID or the United States Government. REDCap is hosted at the  
489 University of Florida Clinical and Translational Science Institute (CTSI), supported by NIH  
490 National Center for Advancing Translational Sciences grant UL1 TR000064.

491

## 492 **References**

- 493 1. Hentschel V, Arnold F, Seufferlein T, Azoitei N, Kleger A, Müller M. Enteropathogenic  
494 Infections: Organoids Go Bacterial. *Stem Cells International*. 2021;2021:e8847804.
- 495 2. Chen D, Mechlowitz K, Li X, Schaefer N, Havelaar AH, McKune SL. Benefits and Risks of  
496 Smallholder Livestock Production on Child Nutrition in Low- and Middle-Income Countries.  
497 *Front Nutr*. 2021;8.
- 498 3. Soliman A, De Sanctis V, Alaaraj N, Ahmed S, Alyafei F, Hamed N, et al. Early and Long-  
499 term Consequences of Nutritional Stunting: From Childhood to Adulthood. *Acta Biomed*.  
500 2021;92:e2021168.
- 501 4. GBD 2017 Diarrhoeal Disease Collaborators. Quantifying risks and interventions that have  
502 affected the burden of diarrhoea among children younger than 5 years: an analysis of the Global  
503 Burden of Disease Study 2017. *Lancet Infect Dis*. 2020;20:37–59.
- 504 5. Robert E, Grippa M, Nikiema DE, Kergoat L, Koudougou H, Auda Y, et al. Environmental  
505 determinants of *E. coli*, link with the diarrheal diseases, and indication of vulnerability criteria in

- 506 tropical West Africa (Kapore, Burkina Faso). *PLOS Neglected Tropical Diseases*.  
507 2021;15:e0009634.
- 508 6. Martin. Water and Sanitation. United Nations Sustainable Development.  
509 <https://www.un.org/sustainabledevelopment/water-and-sanitation/>. Accessed 29 Feb 2024.
- 510 7. Abebe TA, Tucho GT. Open defecation-free slippage and its associated factors in Ethiopia: a  
511 systematic review. *Systematic Reviews*. 2020;9:252.
- 512 8. Alemu ZA, Adugna EA, Kidane AW, Girmay AM, Weldegebriel MG, Likasa BW, et al.  
513 Prevalence of Open Defecation Practice and Associated Factors Among Households in  
514 Geshiyaro Project Implementation Sites in Ethiopia: A Cross-Sectional Study. *Environ Health*  
515 *Insights*. 2024;18:11786302241252732.
- 516 9. Ismail AM, Ibrahim MA, Abdi MM, Geremew A, Mulugeta Y, Ayele DM, et al. Open  
517 defecation practice among households with latrines in rural communities of Ararso District,  
518 Somali Region, Eastern Ethiopia. *Front Public Health*. 2024;12:1394351.
- 519 10. The MAL-ED Network Investigators. The MAL-ED Study: A Multinational and  
520 Multidisciplinary Approach to Understand the Relationship Between Enteric Pathogens,  
521 Malnutrition, Gut Physiology, Physical Growth, Cognitive Development, and Immune  
522 Responses in Infants and Children Up to 2 Years of Age in Resource-Poor Environments.  
523 *Clinical Infectious Diseases*. 2014;59 suppl\_4:S193–206.
- 524 11. Arnold BF, Null C, Luby SP, Unicomb L, Stewart CP, Dewey KG, et al. Cluster-randomised  
525 controlled trials of individual and combined water, sanitation, hygiene and nutritional  
526 interventions in rural Bangladesh and Kenya: the WASH Benefits study design and rationale.  
527 *BMJ Open*. 2013;3:e003476.
- 528 12. The Sanitation Hygiene Infant Nutrition Efficacy (SHINE) Trial: Rationale, Design, and  
529 Methods. *Clin Infect Dis*. 2015;61 Suppl 7:S685–702.
- 530 13. Chen D, McKune SL, Singh N, Yousuf Hassen J, Gebreyes W, Manary MJ, et al.  
531 *Campylobacter* Colonization, Environmental Enteric Dysfunction, Stunting, and Associated Risk  
532 Factors Among Young Children in Rural Ethiopia: A Cross-Sectional Study From the  
533 *Campylobacter* Genomics and Environmental Enteric Dysfunction (CAGED) Project. *Frontiers*  
534 *in Public Health*. 2021;8.
- 535 14. McLellan SL, Eren AM. Discovering new indicators of fecal pollution. *Trends Microbiol*.  
536 2014;22:697–706.
- 537 15. Devane ML, Moriarty E, Weaver L, Cookson A, Gilpin B. Fecal indicator bacteria from  
538 environmental sources; strategies for identification to improve water quality monitoring. *Water*  
539 *Research*. 2020;185:116204.
- 540 16. Nowicki S, deLaurent ZR, de Villiers EP, Githinji G, Charles KJ. The utility of *Escherichia*  
541 *coli* as a contamination indicator for rural drinking water: Evidence from whole genome  
542 sequencing. *PLoS One*. 2021;16:e0245910.

- 543 17. Brown J, Bir A, Bain RES. Novel methods for global water safety monitoring: comparative  
544 analysis of low-cost, field-ready E. coli assays. *npj Clean Water*. 2020;3:1–6.
- 545 18. Hariri S. Detection of Escherichia coli in Food Samples Using Culture and Polymerase Chain  
546 Reaction Methods. *Cureus*. 14:e32808.
- 547 19. Terefe Y, Deblais L, Ghanem M, Helmy YA, Mummmed B, Chen D, et al. Co-occurrence of  
548 Campylobacter Species in Children From Eastern Ethiopia, and Their Association With  
549 Environmental Enteric Dysfunction, Diarrhea, and Host Microbiome. *Frontiers in Public Health*.  
550 2020;8.
- 551 20. Havelaar AH, Brhane M, Ahmed IA, Kedir J, Chen D, Deblais L, et al. Unravelling the  
552 reservoirs for colonisation of infants with Campylobacter spp. in rural Ethiopia: protocol for a  
553 longitudinal study during a global pandemic and political tensions. *BMJ Open*.  
554 2022;12:e061311.
- 555 21. Deblais L, Ojeda A, Brhane M, Mummmed B, Hassen KA, Ahmedo BU, et al. Prevalence and  
556 Load of the Campylobacter Genus in Infants and Associated Household Contacts in Rural  
557 Eastern Ethiopia: a Longitudinal Study from the Campylobacter Genomics and Environmental  
558 Enteric Dysfunction (CAGED) Project. *Appl Environ Microbiol*. 2023;89:e0042423.
- 559 22. Wang Y, Moe CL, Null C, Raj SJ, Baker KK, Robb KA, et al. Multipathway Quantitative  
560 Assessment of Exposure to Fecal Contamination for Young Children in Low-Income Urban  
561 Environments in Accra, Ghana: The SaniPath Analytical Approach. *Am J Trop Med Hyg*.  
562 2017;97:1009–19.
- 563 23. Penakalapati G, Swarthout J, Delahoy MJ, McAliley L, Wodnik B, Levy K, et al. Exposure  
564 to Animal Feces and Human Health: A Systematic Review and Proposed Research Priorities.  
565 *Environ Sci Technol*. 2017;51:11537–52.
- 566 24. Mills M, Lee S, Piperata BA, Garabed R, Choi B, Lee J. Household environment and animal  
567 fecal contamination are critical modifiers of the gut microbiome and resistome in young children  
568 from rural Nicaragua. *Microbiome*. 2023;11:207.
- 569 25. Baker KK, O'Reilly CE, Levine MM, Kotloff KL, Nataro JP, Ayers TL, et al. Sanitation and  
570 Hygiene-Specific Risk Factors for Moderate-to-Severe Diarrhea in Young Children in the Global  
571 Enteric Multicenter Study, 2007–2011: Case-Control Study. *PLoS Med*. 2016;13:e1002010.
- 572 26. Robert E, Grippa M, Nikiema DE, Kergoat L, Koudougou H, Auda Y, et al. Environmental  
573 determinants of E. coli, link with the diarrheal diseases, and indication of vulnerability criteria in  
574 tropical West Africa (Kapore, Burkina Faso). *PLOS Neglected Tropical Diseases*.  
575 2021;15:e0009634.
- 576 27. Rakhalaru P, Munzhedzi L, Abia ALK, Kabue JP, Potgieter N, Traore AN. Prevalence and  
577 Antimicrobial Resistance Profile of Diarrheagenic Escherichia coli from Fomites in Rural  
578 Households in South Africa. *Antibiotics (Basel)*. 2023;12:1345.



- 579 28. Ramatla T, Ramaili T, Lekota KE, Ndou R, Mphuti N, Bezuidenhout C, et al. A systematic  
580 review and meta-analysis on prevalence and antimicrobial resistance profile of *Escherichia coli*  
581 isolated from water in africa (2000–2021). *Heliyon*. 2023;9:e16123.
- 582 29. Fuhrmeister ER, Ercumen A, Grembi JA, Islam M, Pickering AJ, Nelson KL. Shared  
583 bacterial communities between soil, stored drinking water, and hands in rural Bangladeshi  
584 households. *Water Research X*. 2020;9:100056.
- 585 30. Cantrell ME, Sylvestre É, Wharton H, Scheidegger R, Curchod L, Gute DM, et al. Hands are  
586 frequently contaminated with fecal bacteria and enteric pathogens globally: A systematic review  
587 and meta-analysis. 2023;:2022.07.11.22277510.
- 588 31. Rifqi MA, Hamidah U, Sintawardani N, Harada H, Nyambe S, Sai A, et al. Effect of  
589 handwashing on the reduction of *Escherichia coli* on children’s hands in an urban slum  
590 Indonesia. *Journal of Water and Health*. 2023;21:1651–62.
- 591 32. Wang Y, Mairinger W, Raj SJ, Yakubu H, Siesel C, Green J, et al. Quantitative assessment  
592 of exposure to fecal contamination in urban environment across nine cities in low-income and  
593 lower-middle-income countries and a city in the United States. *Science of The Total*  
594 *Environment*. 2022;806:151273.
- 595 33. Ferretti P, Pasolli E, Tett A, Asnicar F, Gorfer V, Fedi S, et al. Mother-to-Infant Microbial  
596 Transmission from Different Body Sites Shapes the Developing Infant Gut Microbiome. *Cell*  
597 *Host Microbe*. 2018;24:133-145.e5.
- 598 34. Fernández L, Pannaraj PS, Rautava S, Rodríguez JM. The Microbiota of the Human  
599 Mammary Ecosystem. *Frontiers in Cellular and Infection Microbiology*. 2020;10.
- 600 35. Navab-Daneshmand T, Friedrich MND, Gächter M, Montealegre MC, Mlambo LS,  
601 Nhiwatiwa T, et al. *Escherichia coli* Contamination across Multiple Environmental  
602 Compartments (Soil, Hands, Drinking Water, and Handwashing Water) in Urban Harare:  
603 Correlations and Risk Factors. *Am J Trop Med Hyg*. 2018;98:803–13.
- 604 36. Romão NF, Pereira NAC, Funes-Huacca ME, Brito LG. Portable Diagnostic Platform for  
605 Detection of Microorganisms Coliforms and *E. coli*. *Advances in Microbiology*. 2020;10:224.
- 606 37. Rodoplu D, Chang C, Kao C, Hsu C. A micro-pupil device for point-of-care testing of viable  
607 *Escherichia coli* in tap water. *Microchemical Journal*. 2022;178:107390.
- 608 38. Ahmed W, Bivins A, Payyappat S, Cassidy M, Harrison N, Besley C. Distribution of human  
609 fecal marker genes and their association with pathogenic viruses in untreated wastewater  
610 determined using quantitative PCR. *Water Research*. 2022;226:119093.
- 611 39. Diner RE, Zimmer-Faust A, Cooksey E, Allard S, Kodera SM, Kunselman E, et al. Host and  
612 Water Microbiota Are Differentially Linked to Potential Human Pathogen Accumulation in  
613 Oysters. *Applied and Environmental Microbiology*. 2023;89:e00318-23.

615 **Figure captions**

616 Figure 1. Prevalence and concentration of *Escherichia coli* in samples collected within 76  
617 Ethiopian households between May 2021 and June 2022. A) Boxplots of *E. coli* concentration and  
618 table showing *E. coli* prevalence. Concentration data were determined only based on the samples  
619 positive for *E. coli*. Blue shadows within the boxplots represents the density ellipse (graphical  
620 representation that can show data extent, center of mass, least squares fit line and outliers) obtained  
621 based on the *E. coli* concentration data for the designated sample type and time point. HR: hand  
622 rinse. The color of the cells in the table are proportional to the *E. coli* prevalence data (e.g., red  
623 means high prevalence and green means low prevalence). B) Comparison between *E. coli*  
624 prevalence and concentration. Samples from TP1 (red dots; n=586; between May 2021 and  
625 December 2021) were collected when the infants were under 8 months of age, while the samples  
626 from TP2 (blue dots; n=724; between December 2021 and June 2022) were collected when the  
627 infants between 11 and 15 months of age. Dotted circles cluster data (*E. coli* prevalence and  
628 concentration) obtained for similar sample type at TP1 and TP2.

629  
630 Figure 2. Correlation of *E. coli* concentrations between sample types. A) Correlation detected at  
631 TP1 when the infants were under 8 months of age. B) Correlation detected at TP2 when the infants  
632 were between 11 and 14 months of age. Values indicate the  $r^2$  values. The full arrows combined  
633 with the symbol “\*” indicates that the p-value was lower than 0.01. The dotted arrows indicates  
634 that the p-value was lower than 0.05. Only significant data ( $P<0.05$ ) were displayed in the network  
635 maps.

636

637

638 **Table 1. Prevalence of *Escherichia coli* in the ten kebeles surveyed in rural eastern Ethiopia.**

| Kebele ID | Time point 1 |      |           |           | Time point 2 |      |           |           |
|-----------|--------------|------|-----------|-----------|--------------|------|-----------|-----------|
|           | Sample size  | Mean | Lower 95% | Upper 95% | Sample size  | Mean | Lower 95% | Upper 95% |
| 1         | 73           | 56.2 | 44.5      | 67.8      | 96           | 52.1 | 41.9      | 62.2      |
| 2         | 83           | 59   | 48.2      | 69.8      | 97           | 56.7 | 46.7      | 66.7      |
| 3         | 51           | 62.7 | 49        | 76.7      | 66           | 56.1 | 43.8      | 68.3      |
| 4         | 49           | 57.1 | 42.8      | 71.5      | 57           | 54.4 | 41.1      | 67.7      |
| 5         | 56           | 58.9 | 45.6      | 72.2      | 74           | 52.7 | 41.1      | 64.3      |
| 6         | 81           | 61.7 | 50.9      | 72.5      | 93           | 53.8 | 43.4      | 64.1      |
| 7         | 78           | 55.1 | 43.8      | 66.4      | 92           | 60.9 | 50.7      | 71        |
| 8         | 13           | 30.7 | 17.3      | 60        | 20           | 40   | 16.5      | 63.5      |
| 9         | 60           | 61.2 | 49        | 74.3      | 78           | 62.8 | 51.8      | 73.8      |
| 10        | 42           | 57.1 | 41.5      | 72.7      | 51           | 56.9 | 42.8      | 70.9      |
| Total     | 586          | 58.2 | 54.2      | 62.2      | 724          | 55.8 | 52.2      | 59.4      |

639 Value in percentage.

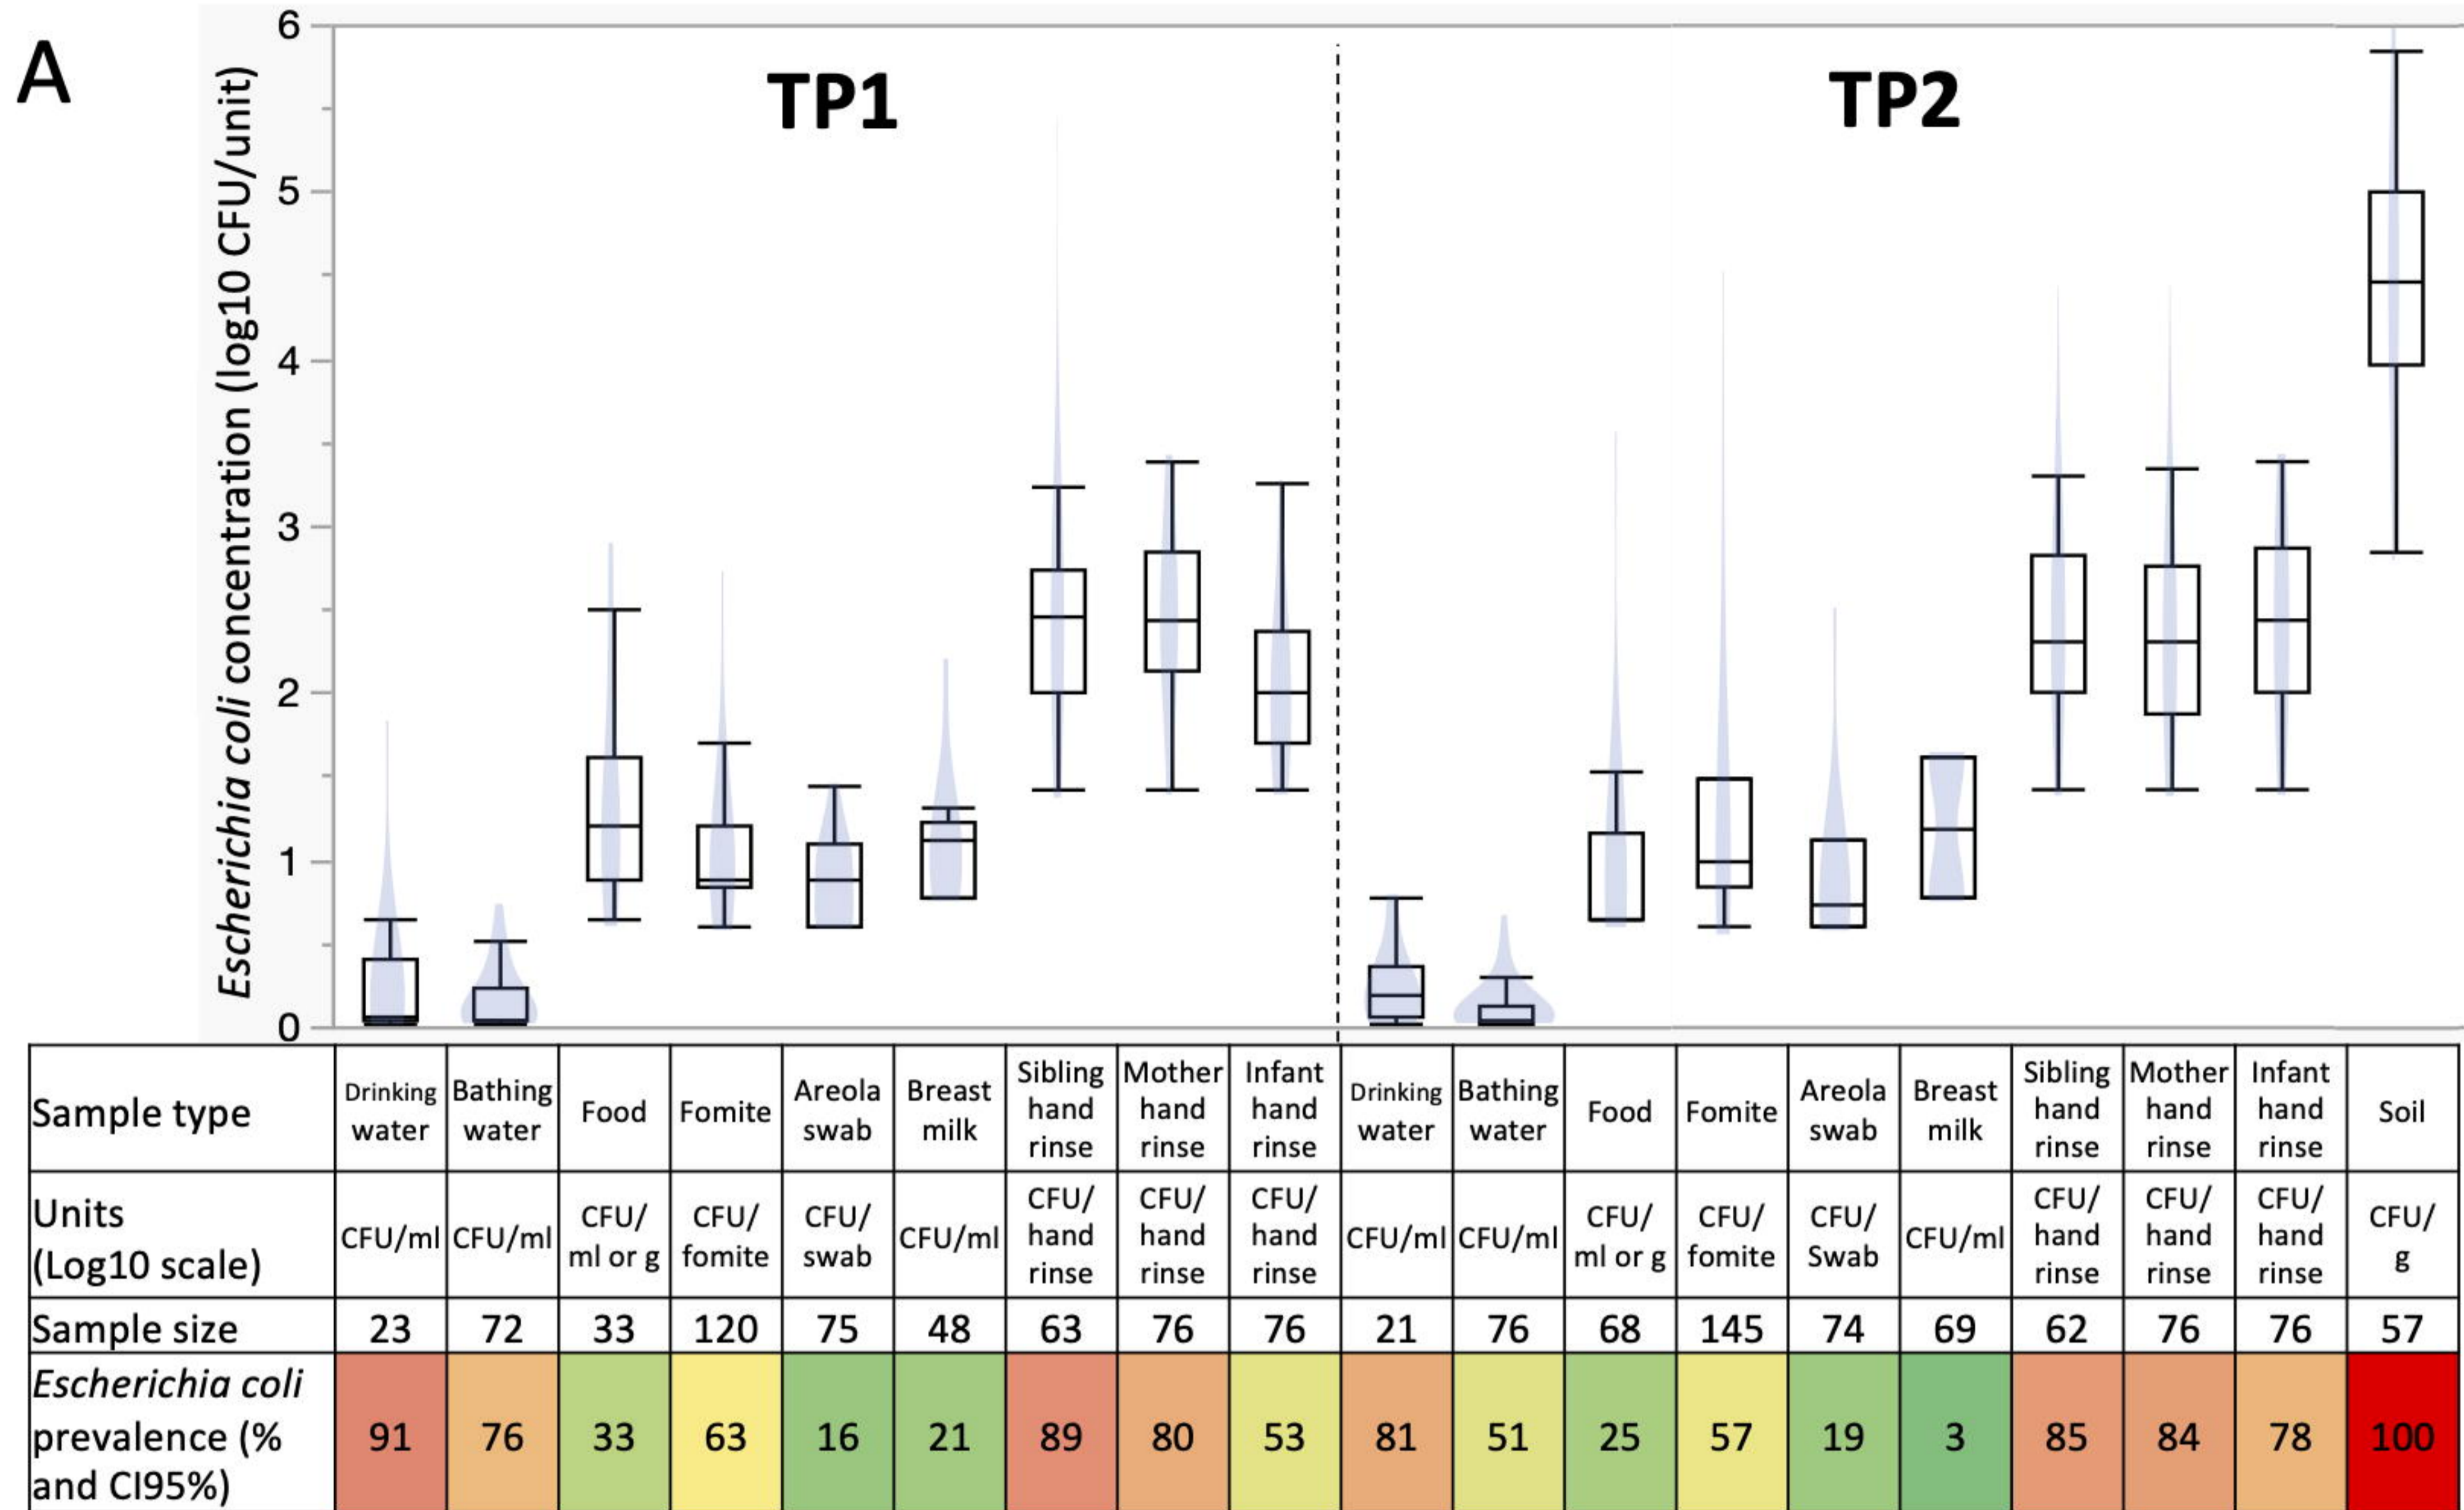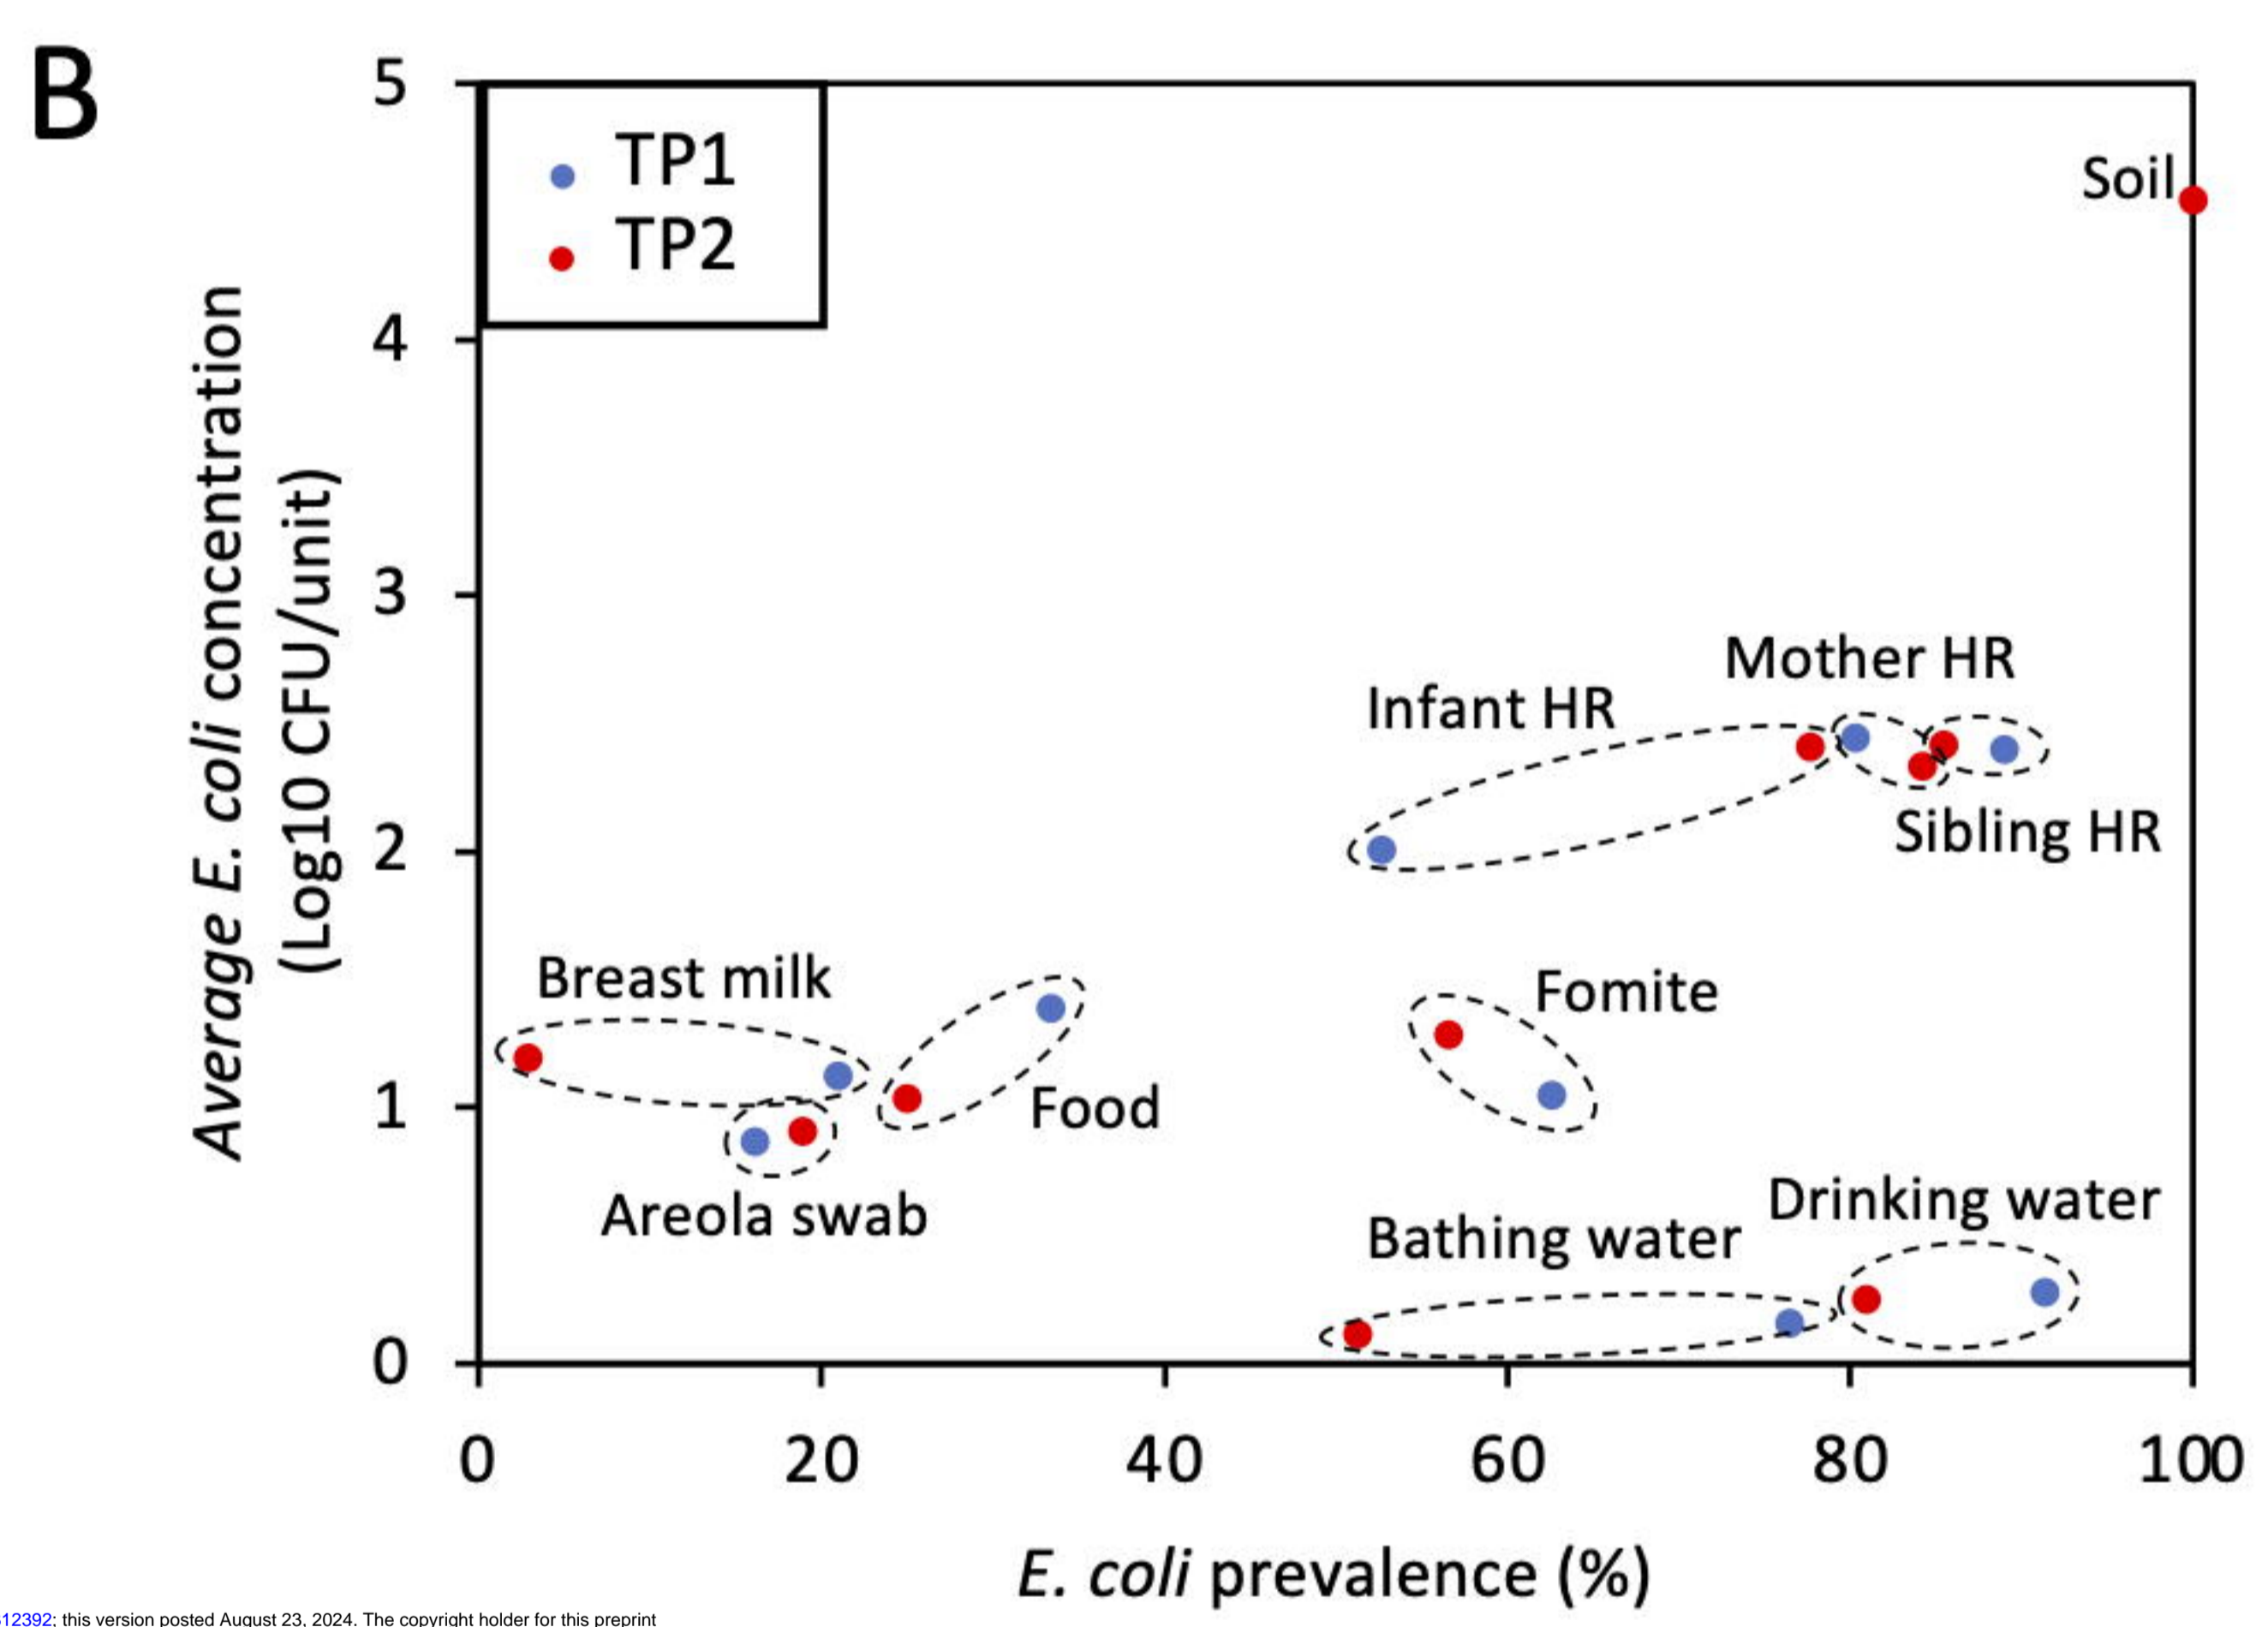

medRxiv preprint doi: <https://doi.org/10.1101/2024.08.21.24312392>; this version posted August 23, 2024. The copyright holder for this preprint (which was not certified by peer review) is the author/funder, who has granted medRxiv a license to display the preprint in perpetuity. It is made available under a CC-BY 4.0 International license.

### A. TP1

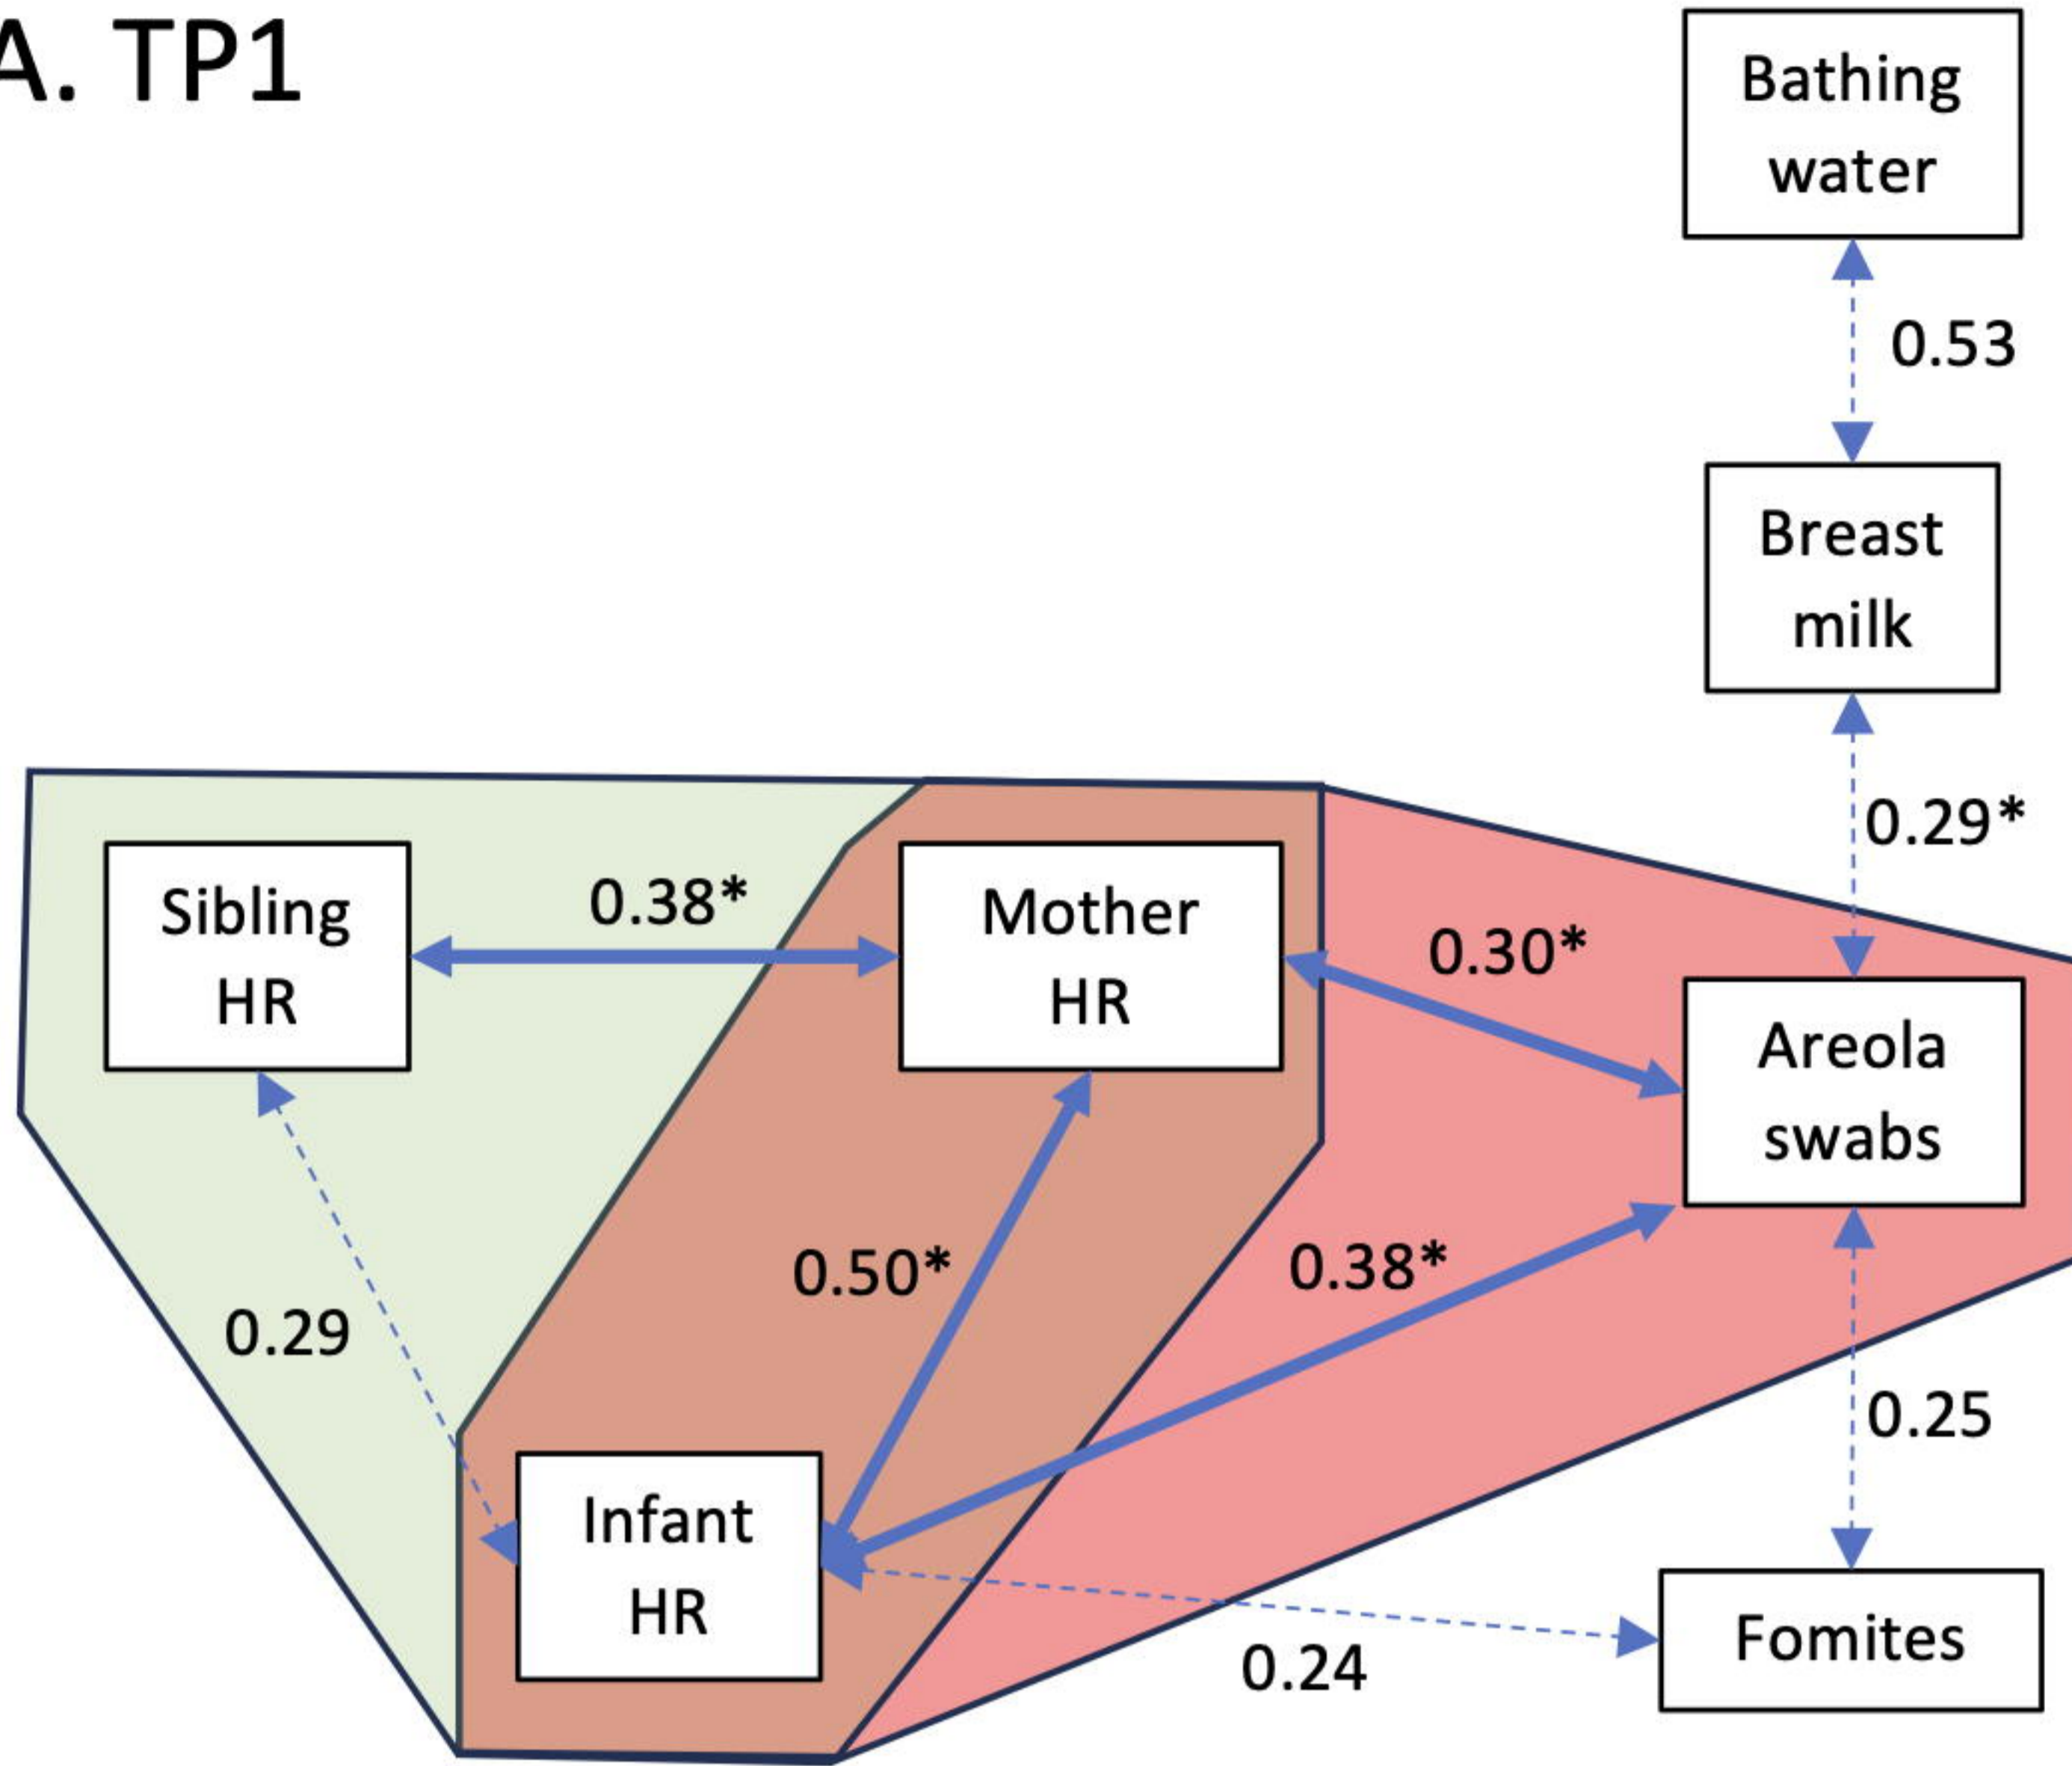

### B. TP2

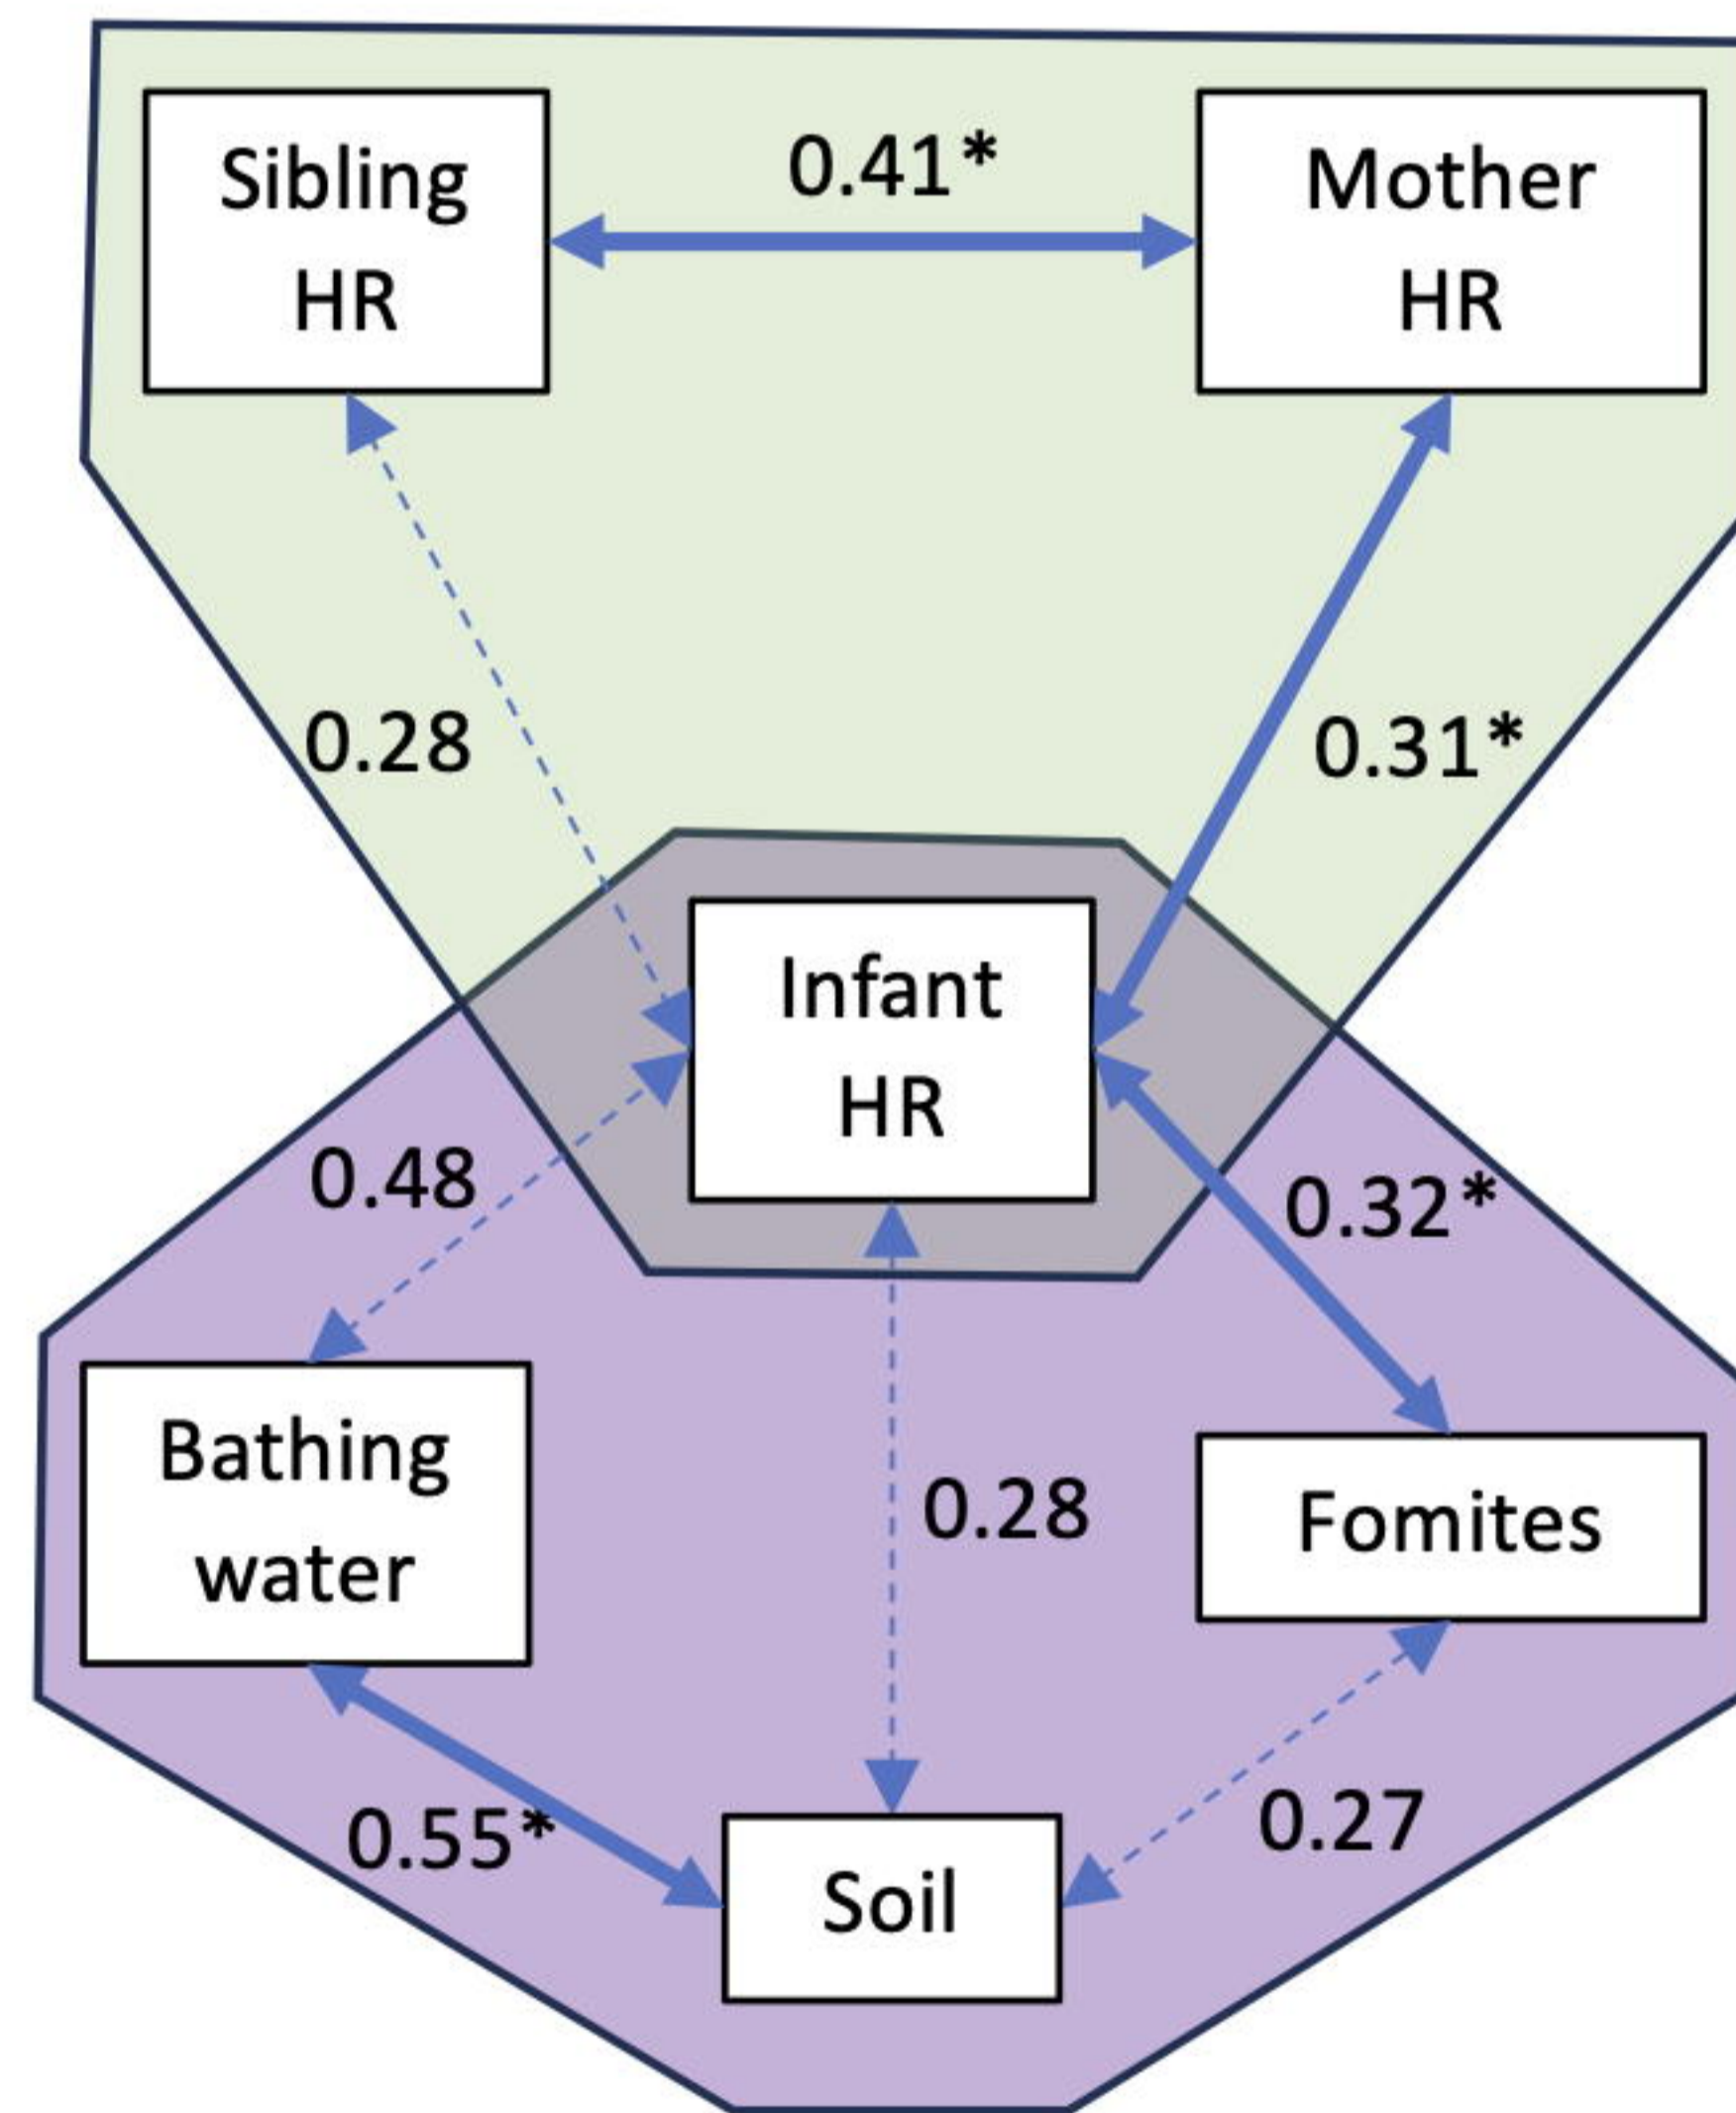

Source: https://medrxiv.org/content/10.1101/2024.08.21.24312392.full.pdf
